# Supplementary material
Source: publisher figshare collection journal article supplement (https://geolsoc.figshare.com/ndownloader/files/21000399)
Supplement: Supplementary file 1 [file 21000399]

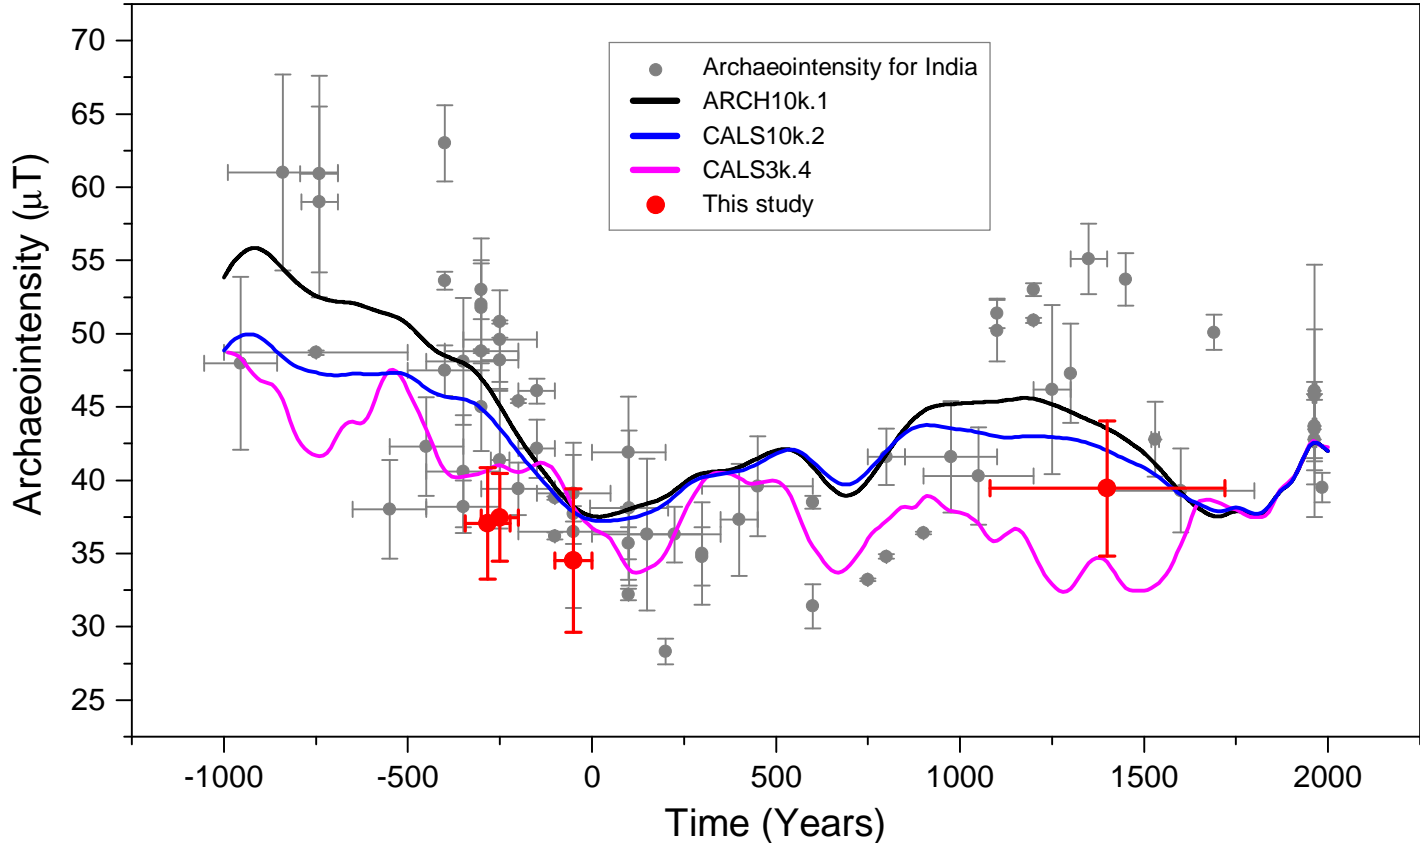

Supplementary Figure 2. New and old India archaeointensity values were compared with other global models (ARCH10k.1, CALS10k.2 and CALS3k.4). The global geomagnetic intensity values recalculated to a Maharashtra region, India (19°N; 74°E).
